# Supplementary material for: Structural Stabilities and Transformation Mechanism of Rhynchophylline and Isorhynchophylline by Ultra Performance Liquid Chromatography/Time-of-Flight Mass Spectrometry (UPLC/Q-TOF-MS)
Source: MDPI journal article supplement (doi:10.3390/molecules200814849), 2015-08-14
Supplement: s1 [file s1]

## Supplementary Materials

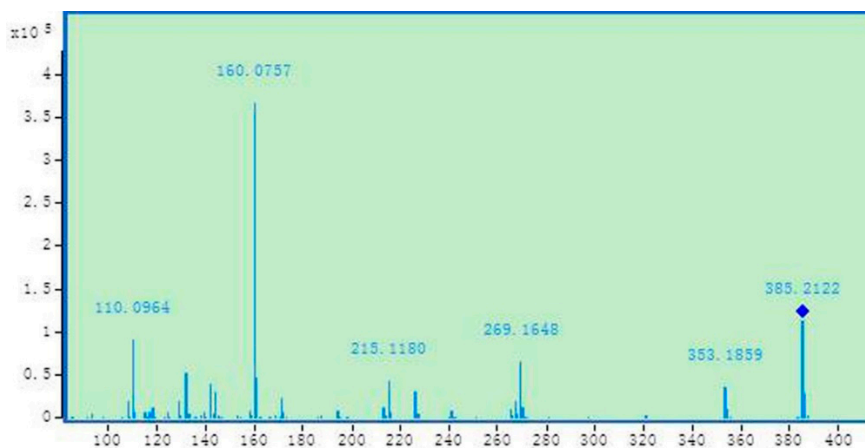

**Figure S1.** The MS spectra of rhynchophylline.

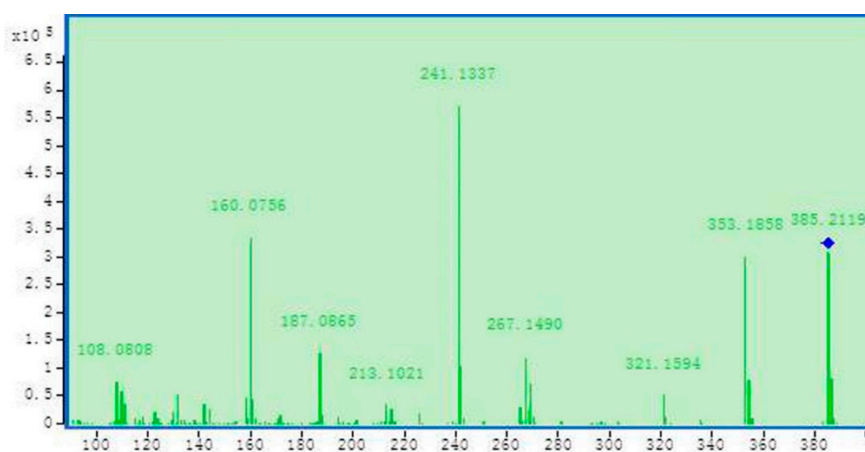

**Figure S2.** The MS spectra of isorhynchophylline.

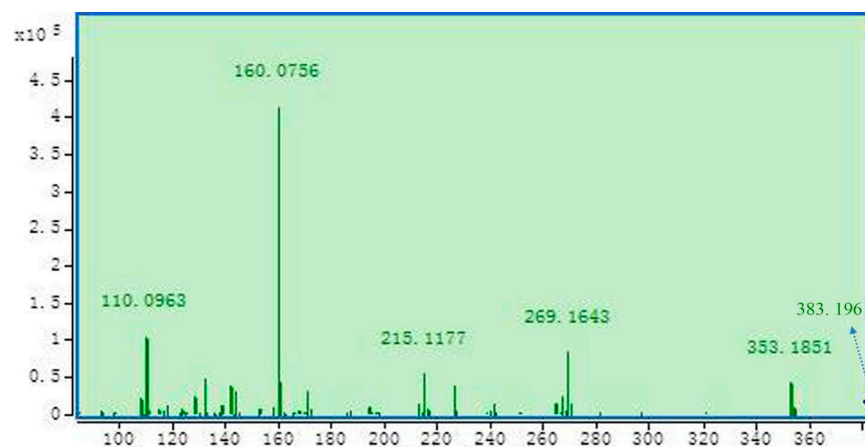

**Figure S3.** The MS spectra of the possible intermediate.
